# Supplementary material
Source: Springer Nature journal article supplement (https://www.springerprofessional.de/resource/supplementary/13638_2012_370_MOESM6_ESM.pdf/11897500)

CC2430

PIR

Fresnel lens  
arrays

Sensor node

Mask

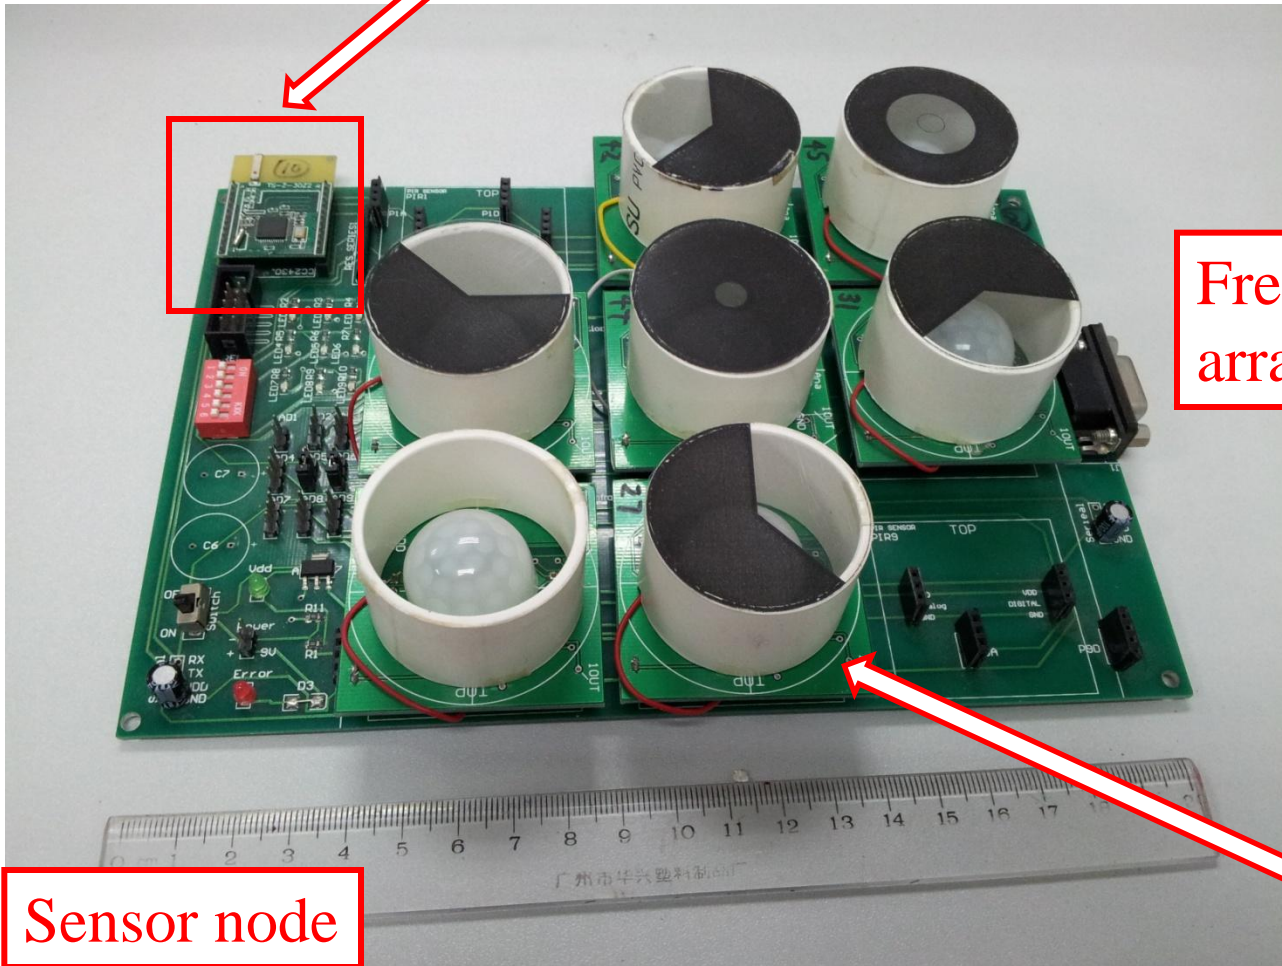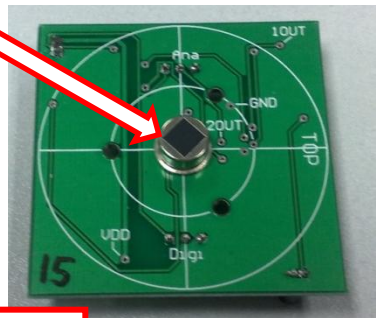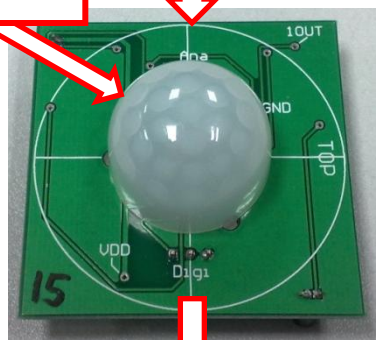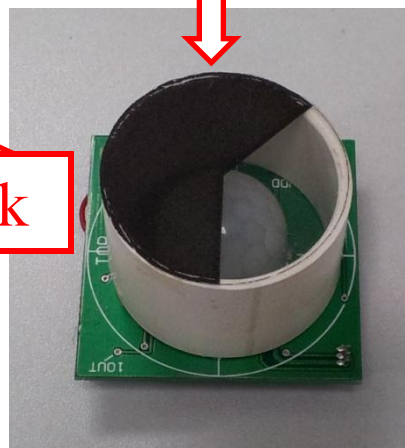

Supplement: MOESM6 [file 11897500]
